# Supplementary material
Source: HighWire-hosted journal article supplement (https://www.jpn.ca/highwire/filestream/89550/field_highwire_adjunct_files/0/jpn-160090-1-at.pdf)
Supplement: jpn-160090-1-at.pdf [file jpn-160090-1-at.pdf]

**Appendix 1** to Zhou J, Ho NF, Li Z, et al. Hemispheric Lateralization Abnormalities of the White Matter Microstructure in Schizophrenia and Bipolar Disorder. *J Psychiatry Neurosci* 2017.

DOI: 10.1503/jpn.160090

Copyright © 2017 The Author(s) or their employer(s). To receive this resource in an accessible format, please contact us at [cmajgroup@cmaj.ca](mailto:cmajgroup@cmaj.ca).

*Online appendices are unedited and posted as supplied by the authors.*

### **Image acquisition**

Diffusion weighted MRI (DW-MRI) images were acquired using a Philips Achieva 3T whole-body MRI scanner with a SENSE head coil at the National Neuroscience Institute, Singapore. Single-shot echo-planar sequence (TR = 3.725s, TE = 56ms, flip angle = 90, field of view 230 x 230 mm<sup>2</sup>, acquisition matrix 112 x 109, reconstruction matrix 256 x 256, 42 slices with 3.0 mm slice thickness parallel to AC-PC line) was used to acquire the DW-MRI image. 15 diffusion-weighted images (b = 800 sec/mm<sup>2</sup>) of non-parallel directions and 1 baseline image (b = 0 sec/mm<sup>2</sup>) were obtained. Three runs of such DW-MRI images were acquired in the same session and were concatenated for processing.

### **Image preprocessing**

Preprocessing of the diffusion weighted MRI (DW-MRI) images were performed using an approach we have used previously.<sup>1,2</sup> Briefly, diffusion images were visually inspected for motion and other artifacts. Eddy-current correction and diffusion gradient rotation were performed on the concatenated 3 runs of DW-MRI images. Subjects with >3mm of motion displacement during the scan were excluded. Diffusion tensors were then fitted for each voxel to obtain the diffusion images for each subject using a FSL software toolbox for analysis of DTI images (FDT),<sup>3</sup> resulting in images of fractional anisotropy (FA), mean diffusivity (MD), axial diffusivity (AD) and radial diffusivity (RD).

### **Derivation of individual-specific diffusion metrics**

Tract-based spatial statistics (TBSS) from the FMRIB Software Library (FSL) was used to produce individual-specific skeletonized indices.<sup>3</sup> First, the FA images of all the subjects were non-linearly aligned to a common space. Second, the aligned FA images were then averaged and “thinned” to create a group mean FA skeleton, representing the center of all WM major tracts common to our study subjects. Third, the aligned FA images of each subject were then projected to the group FA skeleton, and the measures of diffusivity extracted through a method that “searched” the local maxima along the perpendicular direction of the WM skeleton in the original images.<sup>3</sup> Subsequent voxelwise statistics for diffusion metrics across subjects were then carried out on the skeleton-space FA data. We performed similar voxelwise statistics on MD, AD, and RD measures.

### **Derivation of laterality indices**

To generate diffusion-based laterality indices for each individual, the following steps were performed. For example, to generate the FA laterality index, we used a “tbss\_sym” script from FSL<sup>3</sup> that 1) thickened the original (asymmetrical) skeleton by one voxel, 2) flipped the group skeleton left-right, averaged and thinned to create an initial symmetrical FA image, 3) masked the initial symmetrical image with the original thickened skeleton, 4) flipped the masked version back again, and 5) for the

*Online appendices are unedited and posted as supplied by the authors.*

final “symmetrical skeleton” took the parts common to the masked (flipped) and initial symmetrical FA image (non-flipped).<sup>4</sup> Each individual’s FA images were then projected to the symmetrical skeleton to create an individual symmetrical skeleton. Each symmetrically skeletonized FA image was then flipped. We repeated the same steps for the other three diffusion metrics (MD/AD/RD). For each diffusion measure, the subject-level laterality index (LI)<sup>5</sup> was calculated based on the original asymmetric and flipped symmetric skeletonized images as:

$$LI = (\text{original} - \text{flipped}) / (\text{original} + \text{flipped})$$

The value of left hemispheric voxel in the resulting LI image is represented by  $(L - R)/(L + R)$ .<sup>5</sup> L denotes the left hemisphere FA/MD voxel value and R denotes the counterpart voxel value in the right hemisphere. Mathematically, the right hemispheric voxels in the LI images were of the same magnitude but of the opposite sign as those on the left. As such, we only analyzed the LI values in the left hemisphere and used the term “LI” to denote the LI values in the left hemisphere. Positive LI indicates higher FA/MD in the left hemisphere than the right ( $L > R$ , leftward), while negative LI indicates a reversed pattern, with lower FA/MD in the left hemisphere than the right ( $L < R$ , rightward).

### **Derivation of white matter asymmetry indices**

Asymmetry index is calculated as (L minus R) for each voxel of the left hemisphere, where L denotes the value of the WM index voxel in the left hemisphere of the symmetrically skeletonized image, and R denotes the value of the counterpart voxel in the right hemisphere.

Asymmetry images were created by subtracting flipped skeleton projected data from the original data, and zeroing the right sides of the images.<sup>6</sup>

**Appendix 1** to Zhou J, Ho NF, Li Z, et al. Hemispheric Lateralization Abnormalities of the White Matter Microstructure in Schizophrenia and Bipolar Disorder. *J Psychiatry Neurosci* 2017.

DOI: 10.1503/jpn.160090

*Online appendices are unedited and posted as supplied by the authors.*

## **SUPPLEMENTARY REFERENCES**

1. Cortese S, Imperati D, Zhou J, et al. White matter alterations at 33-year follow-up in adults with childhood attention-deficit/hyperactivity disorder. *Biological psychiatry*. 2013;74(8):591-598.
2. Hong Z, Ng KK, Sim SK, et al. Differential age-dependent associations of gray matter volume and white matter integrity with processing speed in healthy older adults. *Neuroimage*. 2015;123:42-50.
3. Smith SM, Jenkinson M, Johansen-Berg H, et al. Tract-based spatial statistics: voxelwise analysis of multi-subject diffusion data. *Neuroimage*. 2006;31(4):1487-1505.
4. Miyata J, Sasamoto A, Koelkebeck K, et al. Abnormal asymmetry of white matter integrity in schizophrenia revealed by voxelwise diffusion tensor imaging. *Human brain mapping*. 2012;33(7):1741-1749.
5. Seghier ML. Laterality index in functional MRI: methodological issues. *Magnetic resonance imaging*. 2008;26(5):594-601.
6. Takao H, Hayashi N, Ohtomo K. White matter asymmetry in healthy individuals: a diffusion tensor imaging study using tract-based spatial statistics. *Neuroscience*. 2011;193:291-299.

*Online appendices are unedited and posted as supplied by the authors.*

## **SUPPLEMENTARY RESULTS**

### **Comparison of white matter laterality indices**

We calculated the percentage of voxels in the white matter regions showing group-based laterality index (LI) differences between BD and SZ. We defined reversed and attenuated laterality according to the directionality of LI in controls. For example, for voxels with negative LI in controls i.e. FA, 1) if patient groups had positive LI, it was categorized as reversed laterality; 2) if patient groups had negative LI with smaller magnitude, it was categorized as attenuated laterality. Vice versa, for voxels with positive LI in healthy controls, i.e. MD, 1) if patient groups had negative LI, it was categorized as reversed laterality; 2) if patient groups had positive LI with smaller magnitude, it was categorized as attenuated laterality.

Among the white matter regions examined in SZ, 44.1% (FA) and 76.2% (MD) of them presented patterns of attenuated laterality as compared with HC. No reversed laterality in SZ was found. In contrast, among the WM regions examined in BD, 16.4% (FA) and 24.9% (MD) of them were found to exhibit patterns of reversed laterality, while 22.7% (FA) and 55.6% (MD) of them exhibited patterns of attenuated laterality. The results suggested that more severe loss of WM lateralization in BD compared to SZ.

DOI: 10.1503/jpn.160090

*Online appendices are unedited and posted as supplied by the authors.*

**SUPPLEMENTARY TABLE 1. Regions showing white matter microstructural differences between subjects with schizophrenia, bipolar disorder, and healthy controls**

| (A)                          | SZ - HC |      | BD - HC |      | BD - SZ |      |
|------------------------------|---------|------|---------|------|---------|------|
|                              | T-score | Size | T-score | Size | T-score | Size |
| <b>Fractional anisotropy</b> |         |      |         |      |         |      |
| <b>Left</b>                  |         |      |         |      |         |      |
| CST                          | -2.84   | 141  | -3.54   | 183  |         |      |
| CP                           | -3.41   | 343  | -3.96   | 392  |         |      |
| aIC                          | -3.1    | 273  | -3.64   | 406  |         |      |
| pIC                          |         |      | -4.63   | 428  | -3.66   | 345  |
| rIC                          | -3.92   | 325  | -4.25   | 274  |         |      |
| aCR                          | -2.75   | 416  | -3.76   | 1044 | -3.38   | 657  |
| sCR                          | -3.73   | 480  | -4.46   | 810  | -3.06   | 309  |
| pCR                          | -3.46   | 482  | -5.05   | 672  |         |      |
| PTR                          | -3.15   | 595  | -2.97   | 549  |         |      |
| SS                           | -3.09   | 126  | -2.26   | 142  |         |      |
| EC                           | -3.89   | 567  | -4.81   | 1169 | -4.16   | 826  |
| Cingulum CG                  |         |      | -4.99   | 315  |         |      |
| Fx/ST                        | -2.18   | 148  |         |      |         |      |
| SLF                          | -2.99   | 453  | -5.06   | 982  |         |      |
| <b>Right</b>                 |         |      |         |      |         |      |
| CST                          | -3.54   | 187  | -4.79   | 220  |         |      |
| ML                           | -3.5    | 107  |         |      |         |      |
| CP                           | -4.69   | 491  | -5.31   | 537  | -3.82   | 411  |
| aIC                          | -3.03   | 623  | -4.49   | 655  | -3.08   | 182  |
| pIC                          | -4.36   | 442  | -4.72   | 742  | -3.7    | 528  |
| rIC                          | -2.64   | 102  | -4.2    | 202  |         |      |
| aCR                          | -2.99   | 666  | -3.78   | 1057 | -2.2    | 281  |
| sCR                          | -3.8    | 790  | -4.75   | 1362 | -3.42   | 1104 |
| pCR                          | -4.05   | 497  | -4.01   | 823  | -3.25   | 493  |
| PTR                          | -3.62   | 673  | -3.4    | 728  |         |      |
| SS                           | -2.6    | 150  | -3.92   | 236  |         |      |
| EC                           | -3.98   | 1017 | -4.73   | 1417 | -4.46   | 791  |
| Cingulum CG                  |         |      | -4.66   | 327  | -3.73   | 233  |
| Fx/ST                        | -3.55   | 196  | -4.09   | 216  |         |      |
| SLF                          |         |      | -4.91   | 1719 | -4.21   | 1269 |
| mCP                          | -3.19   | 326  | -3.94   | 750  | -3.19   | 159  |
| PCT                          | -2.97   | 130  | -3.28   | 142  |         |      |

**Appendix 1** to Zhou J, Ho NF, Li Z, et al. Hemispheric Lateralization Abnormalities of the White Matter Microstructure in Schizophrenia and Bipolar Disorder. *J Psychiatry Neurosci* 2017.

DOI: 10.1503/jpn.160090

*Online appendices are unedited and posted as supplied by the authors.*

| (A)                     | SZ - HC |      | BD - HC |      | BD - SZ |      |
|-------------------------|---------|------|---------|------|---------|------|
|                         | T-score | Size | T-score | Size | T-score | Size |
| gCC                     | -4.13   | 770  | -4.96   | 1658 | -3.69   | 1302 |
| bCC                     | -4.66   | 3181 | -5.11   | 3380 | -3.85   | 1196 |
| SCC                     | -4.47   | 1357 | -5.01   | 2032 | -3.16   | 527  |
| Fx                      | -4.73   | 186  | -4.1    | 194  |         |      |
| <b>Mean Diffusivity</b> |         |      |         |      |         |      |
| <b>Left</b>             |         |      |         |      |         |      |
| aCR                     |         |      | 3.79    | 228  |         |      |
| <b>Right</b>            |         |      |         |      |         |      |
| CP                      |         |      | 3.88    | 319  |         |      |
| aIC                     |         |      | 6.85    | 280  | 3.91    | 102  |
| pIC                     | 3.95    | 237  | 5.72    | 732  | 4.59    | 397  |
| rIC                     |         |      | 4.87    | 606  | 4.08    | 354  |
| aCR                     |         |      | 3.54    | 411  |         |      |
| sCR                     | 5.12    | 772  | 6.98    | 1161 | 3.46    | 150  |
| pCR                     | 3.45    | 110  | 4.94    | 470  |         |      |
| SS                      |         |      | 5.14    | 286  |         |      |
| EC                      | 4.44    | 366  | 6.97    | 716  | 4.43    | 399  |
| Fx/ST                   |         |      | 4.37    | 278  |         |      |
| SLF                     | 4.61    | 727  | 6.07    | 1578 | 5.63    | 218  |
| gCC                     |         |      | 4.87    | 742  |         |      |
| bCC                     |         |      | 5.43    | 2277 |         |      |
| SCC                     |         |      | 3.47    | 292  |         |      |
| Fx                      |         |      | 5.23    | 152  |         |      |

| (B)                      | SZ - HC |      | BD - HC |      | BD - SZ |      |
|--------------------------|---------|------|---------|------|---------|------|
|                          | T-score | Size | T-score | Size | T-score | Size |
| <b>Axial Diffusivity</b> |         |      |         |      |         |      |
| <b>Left</b>              |         |      |         |      |         |      |
| CST                      |         |      | -4.74   | 264  |         |      |
| ML                       |         |      | -4.83   | 106  |         |      |
| iCP                      |         |      | -3.62   | 115  |         |      |
| sCP                      |         |      | -3.83   | 120  |         |      |
| CP                       | -4.77   | 312  | -5.27   | 481  |         |      |
| aIC                      | -4.28   | 174  |         |      |         |      |
| pIC                      | -3.39   | 165  | -4.18   | 705  |         |      |
| rIC                      | -4.08   | 343  | -4.07   | 454  |         |      |

**Appendix 1** to Zhou J, Ho NF, Li Z, et al. Hemispheric Lateralization Abnormalities of the White Matter Microstructure in Schizophrenia and Bipolar Disorder. *J Psychiatry Neurosci* 2017.

DOI: 10.1503/jpn.160090

*Online appendices are unedited and posted as supplied by the authors.*

| (B)                       | SZ - HC |      | BD - HC |      | BD - SZ |      |
|---------------------------|---------|------|---------|------|---------|------|
|                           | T-score | Size | T-score | Size | T-score | Size |
| sCR                       |         |      | -5.48   | 608  |         |      |
| pCR                       |         |      | -3.67   | 559  |         |      |
| PTR                       |         |      | -4.57   | 361  |         |      |
| SS                        | -4.77   | 109  | -4.05   | 316  |         |      |
| EC                        | -3.91   | 445  | -4.05   | 560  |         |      |
| Cingulum CG               |         |      | -4.6    | 232  |         |      |
| Cingulum HIP              |         |      | -4.43   | 214  |         |      |
| Fx/ST                     | -3.97   | 104  | -3.88   | 198  |         |      |
| SLF                       |         |      | -5.03   | 1283 |         |      |
| <b>Right</b>              |         |      |         |      |         |      |
| CST                       |         |      | -3.56   | 223  |         |      |
| ML                        |         |      | -5.61   | 129  |         |      |
| iCP                       |         |      | -4.66   | 152  |         |      |
| sCP                       |         |      | -3.82   | 152  |         |      |
| CP                        |         |      | -3.95   | 180  |         |      |
| pIC                       |         |      | 4.07    | 164  |         |      |
| rIC                       |         |      | 5.04    | 387  |         |      |
| sCR                       |         |      | 4.08    | 127  |         |      |
| mCP                       |         |      | -4.37   | 1064 |         |      |
| bCC                       | -4.82   | 531  | -4.24   | 445  |         |      |
| SCC                       | -3.86   | 120  | -4.88   | 933  |         |      |
| <b>Radial Diffusivity</b> |         |      |         |      |         |      |
| <b>Left</b>               |         |      |         |      |         |      |
| aCR                       |         |      | 4.4     | 524  | 3.14    | 194  |
| sCR                       |         |      | 3.57    | 119  |         |      |
| Cingulum CG               |         |      | 5.01    | 269  |         |      |
| <b>Right</b>              |         |      |         |      |         |      |
| CP                        | 4.59    | 324  | 4.8     | 497  | 3.94    | 288  |
| aIC                       | 3       | 224  | 6.2     | 416  | 3.64    | 139  |
| pIC                       | 4.24    | 274  | 5.4     | 769  | 4.43    | 501  |
| rIC                       | 3.02    | 126  | 4.92    | 435  | 3.97    | 364  |
| aCR                       | 3.9     | 220  | 4.04    | 890  | 2.79    | 221  |
| sCR                       | 4.37    | 1121 | 6.35    | 1384 | 3.56    | 817  |
| pCR                       | 3.55    | 327  | 4.04    | 761  | 3.33    | 372  |
| PTR                       | 4.03    | 573  | 3.19    | 444  |         |      |
| SS                        | 3.46    | 183  | 4.67    | 263  | 3.21    | 135  |
| EC                        | 4.41    | 686  | 6.74    | 1237 | 4.92    | 736  |

*Online appendices are unedited and posted as supplied by the authors.*

| (B)         | SZ - HC |      | BD - HC |      | BD - SZ |      |
|-------------|---------|------|---------|------|---------|------|
|             | T-score | Size | T-score | Size | T-score | Size |
| Cingulum CG |         |      | 4.35    | 264  |         |      |
| Fx/ST       |         |      | 4.65    | 289  | 3.63    | 105  |
| SLF         | 3.74    | 833  | 5.55    | 1819 | 5.13    | 1363 |
| gCC         | 3.91    | 540  | 5.21    | 1387 | 3.25    | 621  |
| bCC         | 4.7     | 2332 | 5.6     | 3212 | 3.98    | 1009 |
| SCC         | 3.8     | 482  | 4.96    | 818  | 3.32    | 303  |
| Fx          |         |      | 5.13    | 185  |         |      |

The table summarizes the difference in **(A)** fractional anisotropy and mean diffusivity in the left and right white matter regions between the three groups (schizophrenia, SZ; bipolar disorder, BD; and healthy controls, HC) (also see main text **Figure 1**). The peak *t* statistics and cluster size of each white matter region with reference to the JHU ICBM-DTI-81 white matter template are presented. Results were thresholded with  $p < 0.05$  (threshold-free cluster enhancement, FWE corrected) with a minimum cluster size of 100 voxels. **(B)** To understand the group differences in fractional anisotropy measures of the white matter regions, both the axial diffusivity (AD) and radial diffusivity (RD) of the affected white matter regions were measured.

In SZ, the decreased FA in the internal capsule, IC, corresponded to both a decrease in AD and increase in RD. In contrast, the decreased FA in the right corpus callosum corresponded to decreases in AD only while the decreased FA in the right corona radiata corresponded to increases in RD.

In BD, the decreased FA found throughout the white matter regions corresponded to both decreases in AD and increases in RD.

Compared with SZ, the BD subjects showed a greater magnitude of RD increase in all the regions of FA abnormalities, but no difference in AD.

Abbreviations: CST, corticospinal tract; CP, cerebral peduncle; aIC, anterior limb of internal capsule; pIC, posterior limb of internal capsule; rIC, retrolenticular limb of internal capsule; aCR, anterior corona radiata; sCR, superior corona radiata; pCR, posterior corona radiata; PTR, posterior thalamic radiation; SS, sagittal stratum; EC, external capsule; Cingulum CG, cingulum (cingulate gyrus); Fx/ST, fornix (cross)/stria terminalis; SLF, superior longitudinal fasciculus; mCP, middle cerebellar peduncle; PCT, pontine crossing tract; gCC, genu of corpus callosum; bCC, body of corpus callosum; SCC, splenium of corpus callosum; FX, fornix.



**Appendix 1** to Zhou J, Ho NF, Li Z, et al. Hemispheric Lateralization Abnormalities of the White Matter Microstructure in Schizophrenia and Bipolar Disorder. *J Psychiatry Neurosci* 2017.

DOI: 10.1503/jpn.160090

*Online appendices are unedited and posted as supplied by the authors.*

**SUPPLEMENTARY TABLE 2. Shared white matter microstructural abnormalities in the schizophrenia and bipolar disorder cohort.**

| Regions      | Cluster size |      |
|--------------|--------------|------|
|              | FA           | MD   |
| <b>Left</b>  |              |      |
| bCC          | 2163         | 1685 |
| Fx           | 153          | 119  |
| CST          | 109          | -    |
| CP           | 264          | -    |
| aIC          | 200          | -    |
| rIC          | 197          | -    |
| aCR          | 310          | 313  |
| sCR          | 480          | -    |
| pCR          | 332          | -    |
| PTR          | 335          | -    |
| EC           | 534          | -    |
| SLF          | 266          | -    |
| <b>Right</b> |              |      |
| mCP          | 160          | -    |
| gCC          | 759          | 812  |
| SCC          | 568          | 220  |
| CST          | 135          | -    |
| CP           | 445          | 276  |
| aIC          | 478          | 308  |
| pIC          | 418          | 815  |
| rLIC         | -            | 594  |
| aCR          | 621          | 446  |
| sCR          | 797          | 1004 |
| pCR          | 479          | 227  |
| PTR          | 625          | -    |
| SS           | -            | 254  |
| EC           | 878          | 713  |
| Fx/ST        | 150          | 216  |
| SLF          | -            | 1014 |

The table summarizes the regions of shared abnormalities in fractional anisotropy (FA), and mean diffusivity (MD) in the schizophrenia and bipolar disorder subjects,

**Appendix 1** to Zhou J, Ho NF, Li Z, et al. Hemispheric Lateralization Abnormalities of the White Matter Microstructure in Schizophrenia and Bipolar Disorder. *J Psychiatry Neurosci* 2017.

DOI: 10.1503/jpn.160090

*Online appendices are unedited and posted as supplied by the authors.*

which were obtained from conjunction analysis of group comparisons of schizophrenia versus healthy controls, and bipolar versus healthy control groups.

Abbreviations: bCC, body of corpus callosum; FX, fornix; CST, corticospinal tract; CP, cerebral peduncle; aIC, anterior limb of internal capsule; pIC, posterior limb of internal capsule; rIC, retrolenticular limb of internal capsule; aCR, anterior corona radiata; sCR, superior corona radiata; pCR, posterior corona radiata; PTR, posterior thalamic radiation; SS, sagittal stratum; EC, external capsule; Fx, fornix, Fx/ST, fornix (cres)/stria terminalis; SLF, superior longitudinal fasciculus; mCP, middle cerebellar peduncle; gCC, genu of corpus callosum; SCC, splenium of corpus callosum.

DOI: 10.1503/jpn.160090

*Online appendices are unedited and posted as supplied by the authors.*

**SUPPLEMENTARY TABLE 3. Group differences in white matter laterality index (LI).** (A) The complete sample of patients with schizophrenia (n=150), bipolar disorder (n=35) and healthy controls (n=77); (B) The complete sample cohort after accounting for lithium medication; (C) The subset of right-handed Chinese patients with schizophrenia (n=122), bipolar disorder (n=30), and healthy controls (n=60).

| A                               | SZ - HC |      | BD - HC |      | BD - SZ |      |
|---------------------------------|---------|------|---------|------|---------|------|
|                                 | T-score | Size | T-score | Size | T-score | Size |
| <b>Fractional anisotropy LI</b> |         |      |         |      |         |      |
| CP                              | 3.36    | 101  | 5.41    | 457  | 4.3     | 274  |
| aIC                             |         |      | 3.28    | 177  |         |      |
| pIC                             | 3.15    | 152  | 5.26    | 601  | 3.91    | 334  |
| rIC                             |         |      | 4.45    | 216  | 3.22    | 163  |
| sCR                             |         |      | 3.96    | 749  | 3.4     | 268  |
| pCR                             |         |      | 2.21    | 106  |         |      |
| EC                              |         |      | 4.91    | 325  |         |      |
| Fx/ST                           |         |      | 4.59    | 186  |         |      |
| SLF                             |         |      | 4.5     | 1020 | 3.78    | 866  |
| mCP                             |         |      | 3.01    | 168  |         |      |
| bCC                             |         |      | 2.96    | 415  |         |      |
| <b>Mean diffusivity LI</b>      |         |      |         |      |         |      |
| CST                             |         |      | -2.92   | 117  |         |      |
| CP                              | -4.37   | 383  | -4.89   | 460  | -3.31   | 182  |
| aIC                             | -3.68   | 219  | -5.64   | 222  |         |      |
| pIC                             | -4.51   | 670  | -7.58   | 795  | -5.09   | 638  |
| rIC                             | -4.27   | 579  | -5.65   | 725  | -3.79   | 487  |
| aCR                             | -3.5    | 536  | -3.46   | 603  |         |      |
| sCR                             | -5.18   | 1149 | -7.49   | 1107 | -4.12   | 673  |
| pCR                             | -5.22   | 618  | -5.66   | 637  | -3.73   | 255  |
| PTR                             | -2.95   | 282  | -3.31   | 149  |         |      |
| SS                              | -4.22   | 368  | -5.86   | 397  | -3.77   | 146  |
| EC                              | -4.01   | 974  | -6.79   | 775  | -3.84   | 487  |
| Cingulum CG                     | -4.4    | 182  | -3.15   | 122  |         |      |
| Fx/ST                           | -4.56   | 270  | -5.69   | 337  | -2.94   | 100  |
| SLF                             | -5.51   | 1344 | -7.74   | 1629 | -4.76   | 1176 |
| gCC                             | -4.66   | 313  | -4.82   | 275  |         |      |
| bCC                             | -4.57   | 814  | -4.8    | 766  |         |      |
| sCC                             | -3.68   | 430  | -3.43   | 421  |         |      |

DOI: 10.1503/jpn.160090

*Online appendices are unedited and posted as supplied by the authors.*

Table 3A summarizes the differences in fractional anisotropy laterality index (LI) and mean diffusivity LI between the three groups (schizophrenia, SZ; bipolar disorder, BD; and healthy controls, HC) (also see main text **Figure 2 a-c**). The peak t statistics and cluster size of each white matter region with reference to the JHU ICBM-DTI-81 white matter template are presented. Results were thresholded with  $p < 0.05$  (threshold-free cluster enhancement, FWE corrected) with minimum cluster size of 10 voxels.

| B                               | SZ - HC |      | BD - HC |      | BD - SZ |      |
|---------------------------------|---------|------|---------|------|---------|------|
|                                 | T-score | Size | T-score | Size | T-score | Size |
| <b>Fractional anisotropy LI</b> |         |      |         |      |         |      |
| CP                              | 3.37    | 111  | 5.05    | 369  |         |      |
| aIC                             |         |      | 3.35    | 186  |         |      |
| pIC                             | 3.53    | 221  | 4.59    | 403  |         |      |
| rIC                             |         |      | 4.61    | 176  |         |      |
| sCR                             |         |      | 3.47    | 391  |         |      |
| EC                              |         |      | 3.83    | 142  |         |      |
| Fx/ST                           |         |      | 3.36    | 109  |         |      |
| SLF                             |         |      | 3.83    | 520  | 3.23    | 246  |
| mCP                             |         |      | 2.89    | 171  |         |      |
| CP                              | 3.37    | 111  | 5.05    | 369  |         |      |
| aIC                             |         |      | 3.35    | 186  |         |      |
| <b>Mean diffusivity LI</b>      |         |      |         |      |         |      |
| CST                             |         |      | -3.01   | 106  |         |      |
| CP                              | -4.25   | 327  | -5.93   | 408  | -3.88   | 201  |
| aIC                             | -3.95   | 233  | -6.04   | 202  | -3.11   | 114  |
| pIC                             | -4.55   | 620  | -7.24   | 749  | -5.09   | 575  |
| rIC                             | -4.26   | 424  | -4.66   | 521  | -3.79   | 327  |
| aCR                             | -4.12   | 537  |         |      |         |      |
| sCR                             | -5.28   | 920  | -7.39   | 943  | -4.09   | 578  |
| pCR                             | -5.17   | 359  | -5.91   | 403  | -3.68   | 102  |
| PTR                             | -3.10   | 366  | -3.25   | 233  |         |      |
| SS                              | -3.45   | 224  | -4.94   | 260  |         |      |
| EC                              | -5.03   | 748  | -6.54   | 638  | -3.84   | 483  |
| Cingulum CG                     | -4.22   | 131  |         |      |         |      |
| Cingulum Hippocampus            |         |      | -4.18   | 112  |         |      |
| Fx/ST                           | -3.72   | 164  | -5.19   | 222  |         |      |
| SLF                             | -5.48   | 771  | -7.22   | 867  | -4.76   | 673  |
| gCC                             | -4.66   | 232  |         |      |         |      |
| bCC                             | -4.66   | 713  | -4.16   | 538  |         |      |
| sCC                             | -3.66   | 284  | -3.35   | 181  |         |      |

DOI: 10.1503/jpn.160090

*Online appendices are unedited and posted as supplied by the authors.*

Table 3B summarizes the group differences in fractional anisotropy LI and mean diffusivity LI after adjusting for lithium medication, which is taken by some SZ and BD patients.

| C                               | SZ - HC |      | BD - HC |      | BD - SZ |      |
|---------------------------------|---------|------|---------|------|---------|------|
|                                 | T-score | Size | T-score | Size | T-score | Size |
| <b>Fractional anisotropy LI</b> |         |      |         |      |         |      |
| CP                              | 3.88    | 235  | 5.15    | 461  | 4.18    | 164  |
| aIC                             |         |      | 3.22    | 373  |         |      |
| pIC                             | 2.92    | 277  | 4.32    | 615  | 3.91    | 240  |
| rIC                             |         |      | 3.48    | 235  |         |      |
| sCR                             |         |      | 4.19    | 869  | 3.02    | 445  |
| SS                              |         |      | 3.59    | 172  |         |      |
| EC                              | 3.93    | 218  | 4.05    | 516  |         |      |
| Fx/ST                           |         |      | 3.39    | 181  |         |      |
| SLF                             |         |      | 4.51    | 738  |         |      |
| mCP                             |         |      | 2.20    | 343  |         |      |
| bCC                             |         |      |         |      | 3.13    | 228  |
| <b>Mean diffusivity LI</b>      |         |      |         |      |         |      |
| CP                              | -4.02   | 210  | -3.97   | 160  |         |      |
| aIC                             | -5.77   | 195  | -3.80   | 188  | -3.13   | 107  |
| pIC                             | -7.63   | 748  | -4.38   | 630  | -4.65   | 603  |
| rIC                             | -5.37   | 514  | -4.62   | 442  | -3.40   | 280  |
| aCR                             | -2.74   | 366  | -3.40   | 302  |         |      |
| sCR                             | -7.38   | 948  | -5.20   | 891  | -4.07   | 511  |
| pCR                             | -5.11   | 377  | -4.85   | 346  |         |      |
| PTR                             | -4.94   | 246  | -3.88   | 230  |         |      |
| EC                              | -7.41   | 629  | -4.74   | 671  | -4.31   | 448  |
| Cingulum CR                     | -4.22   | 249  | -3.89   | 205  |         |      |
| Fx/ST                           | -4.63   | 443  | -4.63   | 352  | -4.19   | 215  |
| SLF                             | -7.605  | 873  | -5.88   | 733  | -4.30   | 642  |
| bCC                             | -4.39   | 692  | -4.04   | 656  |         |      |
| sCC                             | -3.50   | 170  | -4.13   | 111  |         |      |

Table 3C summarizes the differences in fractional anisotropy LI and mean diffusivity LI between the subset of right-handed Chinese participants with schizophrenia, SZ (n=122), bipolar disorder, BD (n=30) and healthy controls, HC (n=60).

**Appendix 1** to Zhou J, Ho NF, Li Z, et al. Hemispheric Lateralization Abnormalities of the White Matter Microstructure in Schizophrenia and Bipolar Disorder. *J Psychiatry Neurosci* 2017.

DOI: 10.1503/jpn.160090

*Online appendices are unedited and posted as supplied by the authors.*

The regions of group-based differences in WM lateralization abnormalities in Tables 3A, 3B and 3C are largely similar.

Abbreviations: CST, corticospinal tract; CP, cerebral peduncle; aIC, anterior limb of internal capsule; pIC, posterior limb of internal capsule; rIC, retrolenticular limb of internal capsule; aCR, anterior corona radiata; sCR, superior corona radiata; pCR, posterior corona radiata; SS, sagittal stratum; EC, external capsule; Cingulum CG, cingulum (cingulate gyrus); Fx/ST, fornix (cross)/stria terminalis; SLF, superior longitudinal fasciculus; mCP, middle cerebellar peduncle; gCC, genu of corpus callosum; bCC, body of corpus callosum; SCC, splenium of corpus callosum.

DOI: 10.1503/jpn.160090

*Online appendices are unedited and posted as supplied by the authors.*

**SUPPLEMENTARY TABLE 4. Shared white matter lateralization abnormalities in (A)** The complete sample of patients with schizophrenia (n=150), bipolar disorder (n=35) and healthy controls (n=77); **(B)** The complete sample cohort after accounting for lithium medication; **(C)** The subset of right-handed Chinese patients with schizophrenia (n=122), bipolar disorder (n=30), and healthy controls (n=60).

| A)      | Cluster size |       |
|---------|--------------|-------|
|         | FA LI        | MD LI |
| Regions |              |       |
| bCC     | -            | 478   |
| gCC     | -            | 176   |
| sCC     | -            | 116   |
| CP      | 109          | 326   |
| alC     | -            | 212   |
| pIC     | 157          | 753   |
| rLIC    | -            | 531   |
| aCR     | -            | 415   |
| sCR     | -            | 988   |
| pCR     | -            | 262   |
| SS      | -            | 342   |
| EC      | -            | 673   |
| Fx/ST   | -            | 201   |
| SLF     | -            | 910   |

Table 4A) summarizes the regions of shared lateralization abnormalities in fractional anisotropy (FA) and mean diffusivities (MD) in the schizophrenia and bipolar disorder subjects. The regions of shared lateralization abnormalities were obtained using conjunction analysis of schizophrenia versus healthy control, and bipolar versus healthy control groups.

Common FA lateralization abnormalities of schizophrenia and bipolar disorder were found in the cerebral peduncle and posterior limb of the internal capsule. Common MD lateralization abnormalities were found in the frontal, subcortical, frontal-occipital/parietal, fornix and corpus callosal tracts.

| B)      | Cluster size |       |
|---------|--------------|-------|
|         | FA LI        | MD LI |
| Regions |              |       |
| bCC     | -            | 384   |
| SCC     | -            | 113   |
| CP      | 103          | 267   |
| alC     | -            | 164   |

**Appendix 1** to Zhou J, Ho NF, Li Z, et al. Hemispheric Lateralization Abnormalities of the White Matter Microstructure in Schizophrenia and Bipolar Disorder. *J Psychiatry Neurosci* 2017.

DOI: 10.1503/jpn.160090

Copyright © 2017, Joule Inc.

*Online appendices are unedited and posted as supplied by the authors.*

| <b>B)</b> | <b>Cluster size</b> |     |
|-----------|---------------------|-----|
| pIC       | 150                 | 614 |
| rLIC      | -                   | 416 |
| aCR       | -                   | 872 |
| sCR       | -                   | 264 |
| pCR       | -                   | 161 |
| SS        | -                   | 198 |
| EC        | -                   | 572 |
| Fx/ST     | -                   | 147 |
| SLF       | -                   | 738 |

Table 4B) summarizes the regions of shared lateralization abnormalities, after adjusting for lithium medication.

| <b>C)</b>      | <b>Cluster size</b> |              |
|----------------|---------------------|--------------|
| <b>Regions</b> | <b>FA LI</b>        | <b>MD LI</b> |
| bCC            | -                   | 429          |
| CP             | 224                 | 304          |
| aIC            | -                   | 120          |
| pIC            | 208                 | 626          |
| rLIC           | -                   | 434          |
| aCR            | -                   | 140          |
| sCR            | -                   | 851          |
| pCR            | -                   | 239          |
| SS             | -                   | 206          |
| EC             | -                   | 566          |
| Fx/ST          | -                   | 190          |
| SLF            | -                   | 715          |

Table 4C summarizes the regions of shared lateralization abnormalities in the subset of right-handed Chinese subjects with schizophrenia and bipolar disorder.

The regions of shared WM lateralization abnormalities in Tables 4A, 4B and 4C are largely similar.

Abbreviations: bCC, body of corpus callosum; gCC, genu of corpus callosum; sCC, splenium of corpus callosum; CP, cerebral peduncle; aIC, anterior limb of internal capsule; pIC, posterior limb of internal capsule; rIC, retrolenticular limb of internal capsule; aCR, anterior corona radiata; sCR, superior corona radiata; pCR, posterior corona radiata; PTR, posterior thalamic radiation; SS, sagittal stratum; EC, external capsule; Fx/ST, fornix (cres)/stria terminalis; SLF, superior longitudinal fasciculus



*Online appendices are unedited and posted as supplied by the authors.*

**Supplementary Table 5. White matter lateralization in schizophrenia is correlated with certain clinical scores in schizophrenia.**

| Clinical Measures<br>Laterality | QOL physical |      | QOL psychological |      | GAF     |      |
|---------------------------------|--------------|------|-------------------|------|---------|------|
|                                 | FA LI        |      | FA LI             |      | FA LI   |      |
|                                 | T-score      | Size | T-score           | Size | T-score | Size |
| CP                              |              |      | -3.43             | 197  | -3.66   | 156  |
| aIC                             |              |      | -3.13             | 206  |         |      |
| pIC                             | -4.03        | 207  | -3.83             | 534  | -4.03   | 347  |
| sCR                             | -3.6         | 109  | -2.93             | 251  | -4.19   | 262  |
| EC                              |              |      | -2.71             | 171  |         |      |
| SLF                             |              |      | -2.8              | 146  | -3.23   | 115  |

The table summarizes the relationship between fractional anisotropy (FA) laterality index (LI) and clinical measures in the schizophrenia group (also see main text **Figure 3**). The peak t statistics and cluster size of each white matter region with reference to the JHU ICBM-DTI-81 white matter template are presented. Results were thresholded with  $p < 0.05$  (threshold-free cluster enhancement, familywise error corrected) with minimum cluster size of 100 voxels. The clinical measures shown here are quality of life (QOL) in the physical health and psychological domains, and global assessment of functioning scale (GAF).

Abbreviations: CP, cerebral peduncle; aIC, anterior limb of internal capsule; pIC, posterior limb of internal capsules; CR, superior corona radiata; pCR, posterior corona radiata; EC, external capsule; SLF, superior longitudinal fasciculus.

**Appendix 1** to Zhou J, Ho NF, Li Z, et al. Hemispheric Lateralization Abnormalities of the White Matter Microstructure in Schizophrenia and Bipolar Disorder. *J Psychiatry Neurosci* 2017.

DOI: 10.1503/jpn.160090

*Online appendices are unedited and posted as supplied by the authors.*

**SUPPLEMENTARY FIGURE 1. Voxel-wise white matter laterality index (LI) of healthy controls (HC), patients with schizophrenia (SZ) and bipolar disorders (BD).**

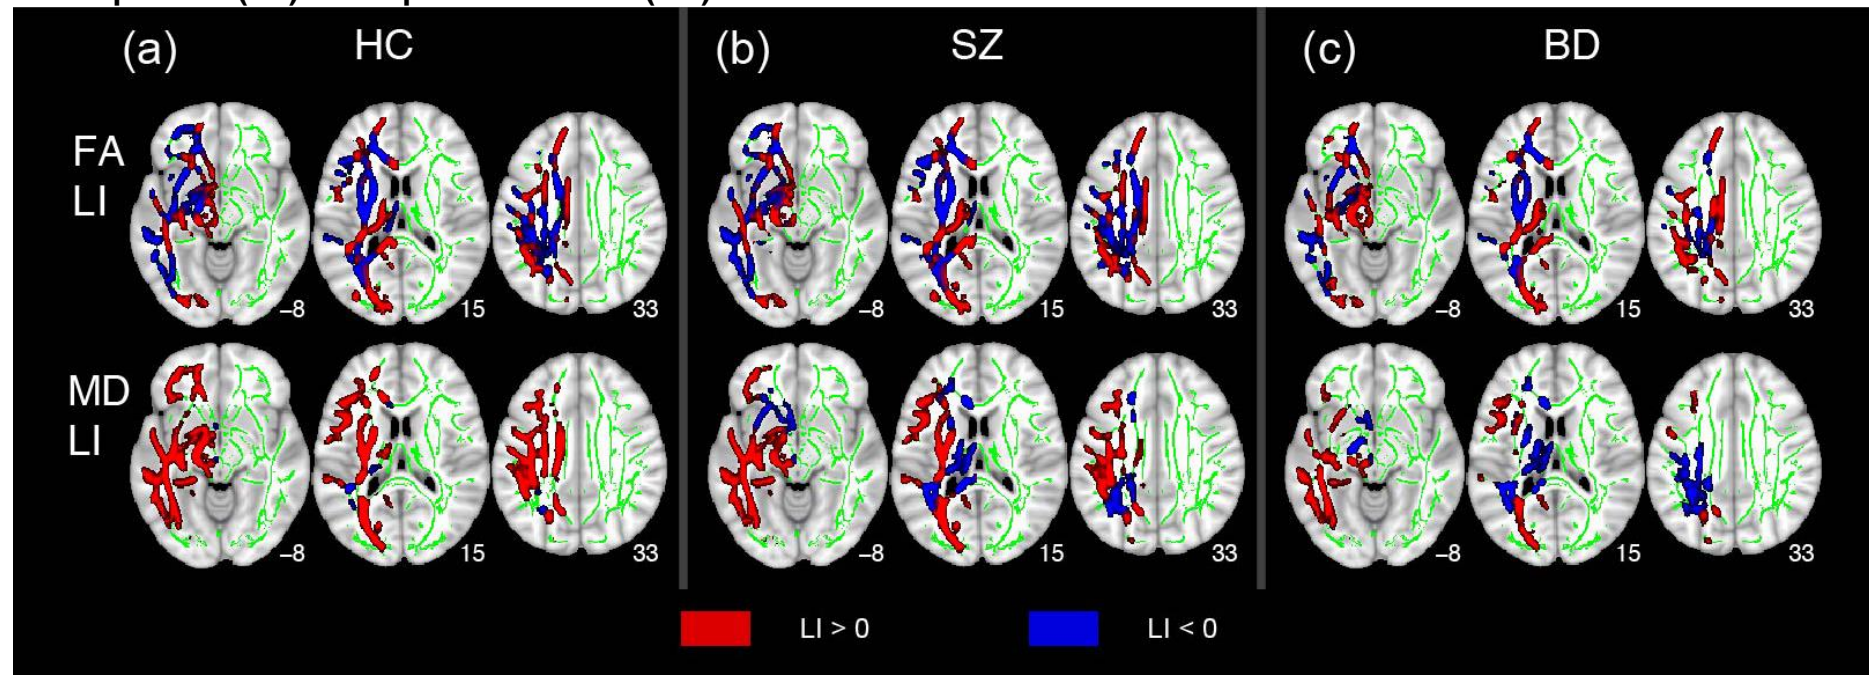

Laterality index (LI) is calculated as  $(L - R)/(L + R)$  for each voxel of the left hemisphere, where L denotes the value of the voxel in the left hemisphere of the symmetrically skeletonized image and R denotes the value of the counterpart voxel in the right hemisphere. As the LI is symmetrical (left and right have equal values), we present images of one hemisphere here, i.e. the left hemisphere. Leftward laterality is denoted by  $LI > 0$  (red) and rightward laterality is denoted by  $LI < 0$  (blue). Group-level laterality index maps of fractional anisotropy (FA) and mean diffusivity (MD) based on one-sample t-test are shown for: (a) HC, (b) SZ, and

**Appendix 1** to Zhou J, Ho NF, Li Z, et al. Hemispheric Lateralization Abnormalities of the White Matter Microstructure in Schizophrenia and Bipolar Disorder. *J Psychiatry Neurosci* 2017.

DOI: 10.1503/jpn.160090

*Online appendices are unedited and posted as supplied by the authors.*

(c) BD. Results were thresholded with  $p \leq 0.05$  (threshold-free cluster enhancement, FWE corrected) and thickened with the “tbss\_fill” command (FSL) for better visibility.

*Online appendices are unedited and posted as supplied by the authors.*

**SUPPLEMENTARY FIGURE 2. Group comparisons of white matter lateralization in the subset of right-handed Chinese healthy controls (HC), patients with schizophrenia (SZ) and patients with bipolar disorder (BD).**

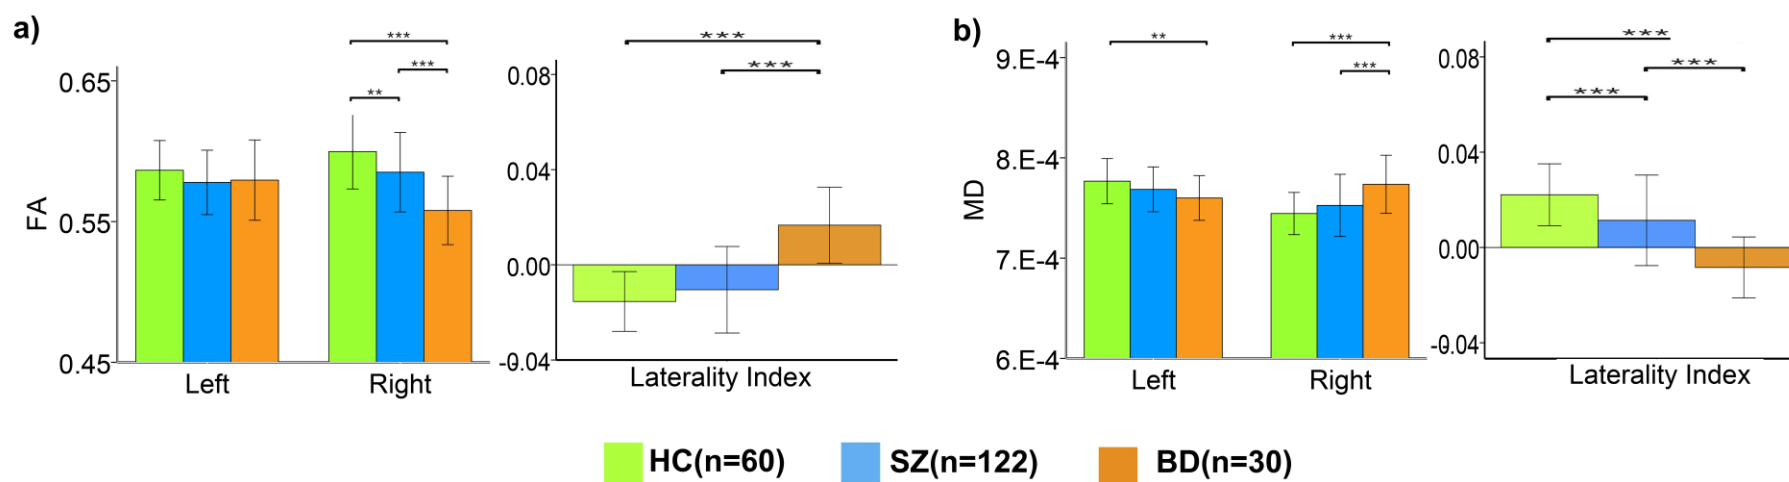

White matter regions of abnormal lateralization between SZ and BD were parsed as a post-hoc analysis. **a)** Within-group average of FA values in each of the left and right hemisphere were measured for HC (green), SZ (blue) and BD (orange) groups. BD subjects demonstrated decreased FA in the right hemisphere compared with HC and SZ. Comparisons of mean FA laterality indices revealed reversed lateralization in BD compared with HC and SZ. **b)** The within-group averaged MD values in the left and right hemisphere of the different groups are shown. BD subjects showed decreased MD in the left hemisphere, and increased MD in the right hemisphere compared with HC and SZ. Overall, SZ subjects showed attenuated mean MD LI compared with controls.

**Appendix 1** to Zhou J, Ho NF, Li Z, et al. Hemispheric Lateralization Abnormalities of the White Matter Microstructure in Schizophrenia and Bipolar Disorder. *J Psychiatry Neurosci* 2017.

DOI: 10.1503/jpn.160090

*Online appendices are unedited and posted as supplied by the authors.*

Conversely, BD subjects showed reversed MD LI. The mean and standard deviation of each group are presented by the bar charts. \*\* and \*\*\* denotes  $p < 0.01$  and  $p < .005$ .

*Online appendices are unedited and posted as supplied by the authors.*

**SUPPLEMENTARY FIGURE 3. White matter asymmetry abnormalities in subjects with schizophrenia (SZ) and bipolar disorders (BD) compared to healthy controls (HC).**

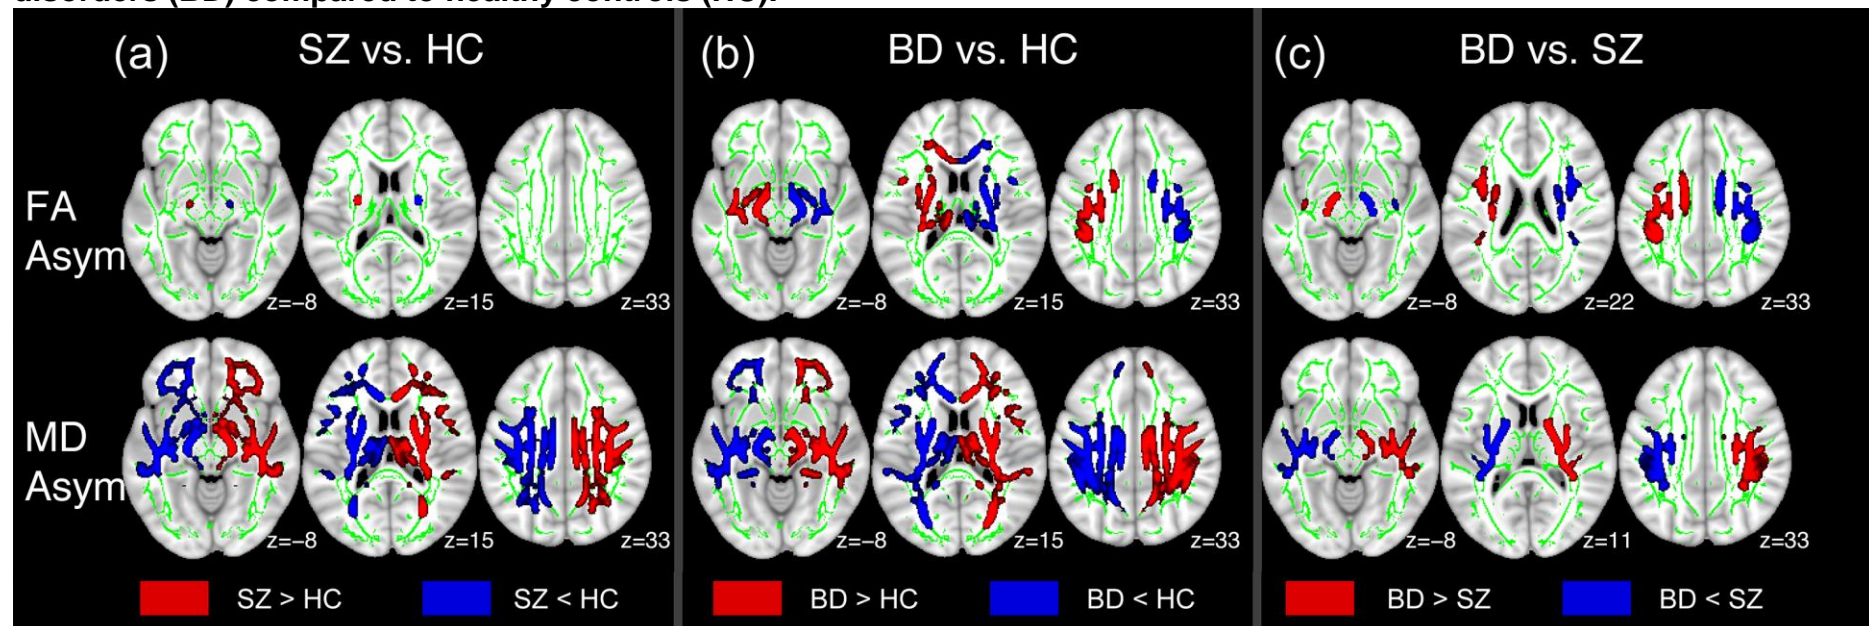

Between-group comparisons revealed: (a) increased fractional anisotropy (FA) asymmetry (row 1, in red), reduced axial diffusivity (AD), mean diffusivity (MD) and radial diffusivity (RD) asymmetry (row 2, 3 and 4, in blue) in SZ compared to HC; (b) increased FA asymmetry (row 1, in red), reduced AD, MD and RD asymmetry (row 2, 3 and 4, in blue) in BD compared to HC; (c) greater FA asymmetry (row 1, in red), smaller AD, MD and RD asymmetry (row 2, 3 and 4, in blue) in BD compared with SZ. Results were thresholded with  $p < 0.05$  (threshold-free cluster enhancement, FWE corrected) and thickened with the “tbss\_fill” command (FSL) for better visibility.

Online appendices are unedited and posted as supplied by the authors.

**SUPPLEMENTARY FIGURE 4. Group comparisons of mean values of white matter measures and their asymmetry index in healthy controls (HC) schizophrenia (SZ) and bipolar (BD) subjects**

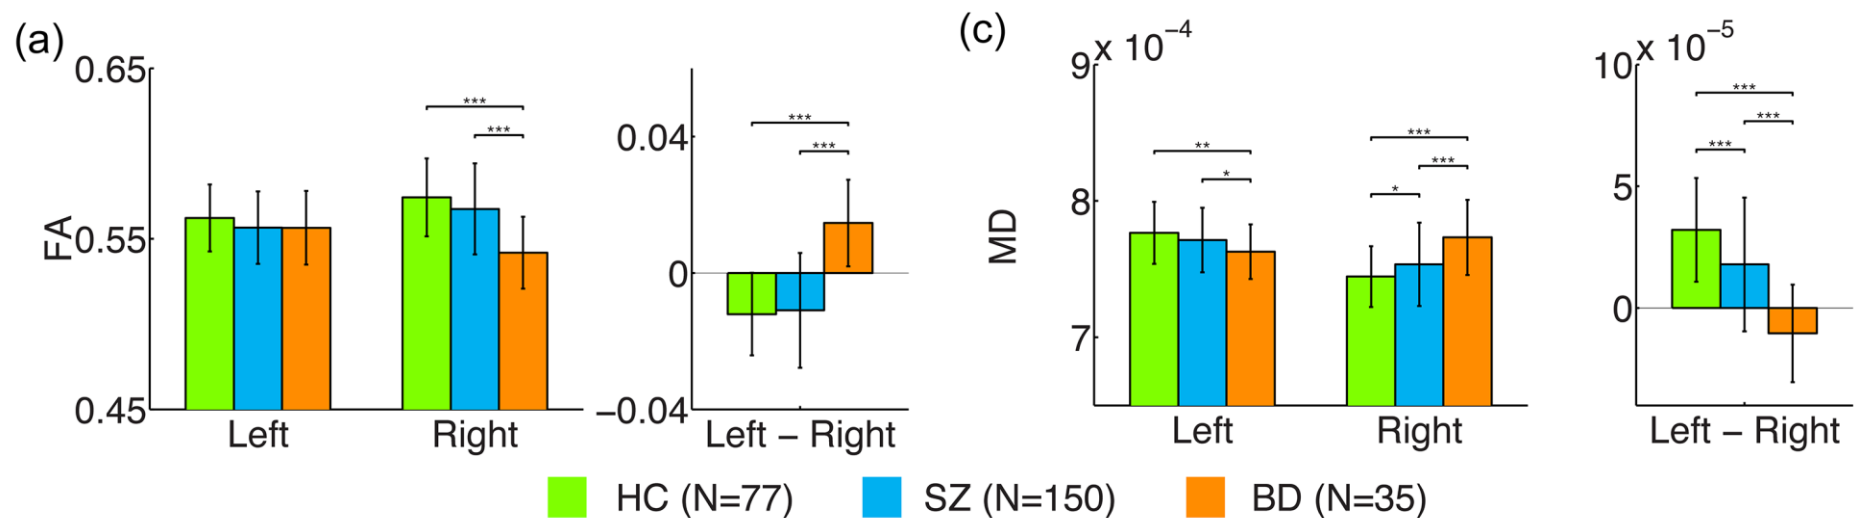

The mean values in the left hemisphere, right hemisphere and the symmetry values of (a) fractional anisotropy, FA, (b) axial diffusivity, AD, (c) mean diffusivity, MD and (d) radial diffusivity, RD asymmetry. For every subject, the mean left/right FA, AD, MD, and RD values were extracted based on the regions-of-interests (and their contra-lateral part) defined from the group asymmetry difference maps between SZ and BD highlighted in (Figure S1.c). Subject-level mean asymmetry values were calculated based on the same regions-of-interests on the left hemisphere. Similar to the laterality index comparison (Fig. 3), significant attenuated AD/MD/RD asymmetry was found in SZ group while significant reversed FA/AD/MD/RD asymmetry pattern was presented in BD group. The mean and standard deviation of each group are presented. \*, \*\* and \*\*\* denotes  $p < 0.05$ ,  $p < 0.01$ ,  $p < 0.001$ , respectively. Left – left hemisphere; right – right hemisphere.
